# Supplementary material for: Comparative Analysis of NSP1–40S Ribosomal Interactions Across Intermediate Hosts: Implications for Host Translation Disruption Comparative Analysis of NSP1–40S Ribosomal Interactions Across Intermediate Hosts: Implications for Host Translation Disruption
Source: Research Square preprint supplement (doi:10.21203/rs.3.rs-7546879/v1), 2025-09-25

**Ribosomal s30 alignments**

>7K5I_34|Chain e|40S ribosomal protein S30|Homo sapiens (9606)

KVHGSLARAGKVRGQTPKVAKQEKKKKKTGRAKRRMQYNRRFVNVVPTFGKKKGPNANS

>EQB77739.1 40S ribosomal protein S30 [Camelus ferus]

MQLFVRAQELHTLEVTGQETVAQIKAHVASLEGIAPEDQVVLLAGTPLEDEATLGQCGVEALSTLEVAGR

MLGGKVHGSLARAGKVRGQTPKVAKQEKKKKKTGRAKRRMQYNRRFVNVVPTFGKKKGPNANS

>NP_777156.1 40S ribosomal protein S30 [Bos taurus]

MQLFVRAQELHTLEVTGQETVAQIKAHVASLEGIAPEDQVLLLAGTPLEDEATLGQCGVEALSTLEVAGR

MLGGKVHGSLARAGKVRGQTPKVAKQEKKKKKTGRAKRRMQYNRRFVNVVPTFGKKKGPNANS

>NP_032016.1 40S ribosomal protein S30 [Mus musculus]

MQLFVRAQELHTLEVTGQETVAQIKDHVASLEGIAPEDQVVLLAGSPLEDEATLGQCGVEALTTLEVAGR

MLGGKVHGSLARAGKVRGQTPKVAKQEKKKKKTGRAKRRMQYNRRFVNVVPTFGKKKGPNANS

>NP_001233753.1 40S ribosomal protein S30 [Cricetulus griseus]

MQLFVRAQGLHTLEVTGQETVAQIKAHVASLEGISPEDQVVLLAGSPLEDEATLGQCGVEALTTLEVAGR

MLGGKVHGSLARAGKVRGQTPKVAKQEKKKKKTGRAKRRMQYNRRFVNVVPTFGKKKGPNAN

>XP_036784592.1 ubiquitin-like protein fubi and ribosomal protein S30 [Manis pentadactyla]

MQLFVRAQELHTLEVTGEETVAQIKAHVALLEGIAPEDQVLLLAGTPLDDEAALGQCGVEALTTLEVVGR

MLGGKVHGSLARAGKVRGQTPKVAKQEKKKKKTGRAKRRMQYNRRFVNVVPTFGKKKGPNANS

>XP_017514719.1 ubiquitin-like protein fubi and ribosomal protein S30 [Manis javanica]

MQLFVRAQELHTLEVTGEETVAQIKAHVALLEGIAPEDQVLLLAGTPLDDEAALGQCGVEALTTLEVVGR

MLGGKVHGSLARAGKVRGQTPKVAKQEKKKKKTGRAKRRMQYNRRFVNVVPTFGKKKGPNANS

>XP_004596746.1 ubiquitin-like protein fubi and ribosomal protein S30 [Ochotona princeps]

MQLFVRAQELHTLEVTGQETVAQIKAHVASLEGIAPEDQVMLLAGTPLEDDAVLAQCGVQALSTLEVAGR

MLGGKVHGSLARAGKVRGQTPKVAKQEKKKKKTGRAKRRMQYNRRFVNVVPTFGKKKGPNANS

>XP_031302784.1 ubiquitin-like protein FUBI [Camelus dromedarius]

MQSVFHLGSGGHGSVAKMQLFVCAQELHTLEVTSQETVTQIKAHVASLEDIAPEDQVMLLAGTPLEDEAT

LGQCGVEALSTLEVASRVLGGKVHGSLGRAGKVRGQTPKEAKQEKKKTGQAKRRMQYNRRFVNVVPTFGK

KKGPNANS

>XP_005864282.1 PREDICTED: ubiquitin-like protein fubi and ribosomal protein S30 [Myotis brandtii]

MQLFVRAQELHTLEVTGRETVSQIKAHVASLEGIAPEDQVVLLAGTPLEDEATLGQCGVEALSTLEVAAR

MLGGKVHGSLARAGKVRGQTPKVAKQEKKKKKTGRAKRRMQYNRRFVNVVPTFGKKKGPNANS

>XP_003828658.1 ubiquitin-like protein fubi and ribosomal protein S30 [Pan paniscus]

MQLFVRAQELHTFEVTGQETVAQIKAHVASLEGIAPEDQVVLLAGTPLEDEATLGQCGVEALTTLEVAGR

MLGGKVHGSLARAGKVRGQTPKVAKQEKKKKKTGRAKRRMQYNRRFVNVVPTFGKKKGPNANS

>XP_032975976.1 ubiquitin-like protein fubi and ribosomal protein S30 [Rhinolophus ferrumequinum]

MQLFVRAQDLHTLEVTGQETVSQIKAHVASLEGIAPEDQVVLLAGTPLEDEATLGQCGVEALTTLEVAGR

MLGGKVHGSLARAGKVRGQTPKVAKQEKKKKKTGRAKRRMQYNRRFVNVVPTFGKKKGPNANS

XP_031302784.1 MQSVFHLGSGGHGSVAKMQLFVCAQELHTLEVTSQETVTQIKAHVASLEDIAPEDQVMLL 60

NP_001233753.1

-----------------MQLFVRAQGLHTLEVTGQETVAQIKAHVASLEGISPEDQVVLL 43

XP_032975976.1

-----------------MQLFVRAQDLHTLEVTGQETVSQIKAHVASLEGIAPEDQVVLL 43

XP_003828658.1

-----------------MQLFVRAQELHTFEVTGQETVAQIKAHVASLEGIAPEDQVVLL 43

XP_005864282.1

-----------------MQLFVRAQELHTLEVTGRETVSQIKAHVASLEGIAPEDQVVLL 43

XP_004596746.1

-----------------MQLFVRAQELHTLEVTGQETVAQIKAHVASLEGIAPEDQVMLL 43

XP_017514719.1

-----------------MQLFVRAQELHTLEVTGEETVAQIKAHVALLEGIAPEDQVLLL 43

XP_036784592.1

-----------------MQLFVRAQELHTLEVTGEETVAQIKAHVALLEGIAPEDQVLLL 43

NP_032016.1

-----------------MQLFVRAQELHTLEVTGQETVAQIKDHVASLEGIAPEDQVVLL 43

NP_777156.1

-----------------MQLFVRAQELHTLEVTGQETVAQIKAHVASLEGIAPEDQVLLL 43

7K5I_34|Chain

------------------------------------------------------------ 0

EQB77739.1

-----------------MQLFVRAQELHTLEVTGQETVAQIKAHVASLEGIAPEDQVVLL 43

XP_031302784.1

AGTPLEDEATLGQCGVEALSTLEVASRVLGGKVHGSLGRAGKVRGQTPKEAKQEK--KKT 118

NP_001233753.1 AGSPLEDEATLGQCGVEALTTLEVAGRMLGGKVHGSLARAGKVRGQTPKVAKQEKKKKKT 103

XP_032975976.1 AGTPLEDEATLGQCGVEALTTLEVAGRMLGGKVHGSLARAGKVRGQTPKVAKQEKKKKKT 103

XP_003828658.1 AGTPLEDEATLGQCGVEALTTLEVAGRMLGGKVHGSLARAGKVRGQTPKVAKQEKKKKKT 103

XP_005864282.1 AGTPLEDEATLGQCGVEALSTLEVAARMLGGKVHGSLARAGKVRGQTPKVAKQEKKKKKT 103

XP_004596746.1 AGTPLEDDAVLAQCGVQALSTLEVAGRMLGGKVHGSLARAGKVRGQTPKVAKQEKKKKKT 103

XP_017514719.1 AGTPLDDEAALGQCGVEALTTLEVVGRMLGGKVHGSLARAGKVRGQTPKVAKQEKKKKKT 103

XP_036784592.1 AGTPLDDEAALGQCGVEALTTLEVVGRMLGGKVHGSLARAGKVRGQTPKVAKQEKKKKKT 103

NP_032016.1 AGSPLEDEATLGQCGVEALTTLEVAGRMLGGKVHGSLARAGKVRGQTPKVAKQEKKKKKT 103

NP_777156.1 AGTPLEDEATLGQCGVEALSTLEVAGRMLGGKVHGSLARAGKVRGQTPKVAKQEKKKKKT 103

7K5I_34|Chain

-------------------------------KVHGSLARAGKVRGQTPKVAKQEKKKKKT 29

EQB77739.1 AGTPLEDEATLGQCGVEALSTLEVAGRMLGGKVHGSLARAGKVRGQTPKVAKQEKKKKKT 103

******.*********** ***** ***

XP_031302784.1 GQAKRRMQYNRRFVNVVPTFGK**K**KGPNANS 148

NP_001233753.1 GRAKRRMQYNRRFVNVVPTFGK**K**KGPNAN- 132

XP_032975976.1 GRAKRRMQYNRRFVNVVPTFGK**K**KGPNANS 133

XP_003828658.1 GRAKRRMQYNRRFVNVVPTFGK**K**KGPNANS 133

XP_005864282.1 GRAKRRMQYNRRFVNVVPTFGK**K**KGPNANS 133

XP_004596746.1 GRAKRRMQYNRRFVNVVPTFGK**K**KGPNANS 133

XP_017514719.1 GRAKRRMQYNRRFVNVVPTFGKKKGPNANS 133

XP_036784592.1 GRAKRRMQYNRRFVNVVPTFGK**K**KGPNANS 133

NP_032016.1 GRAKRRMQYNRRFVNVVPTFGK**K**KGPNANS 133

NP_777156.1 GRAKRRMQYNRRFVNVVPTFGK**K**KGPNANS 133

7K5I_34|Chain GRAKRRMQYNRRFVNVVPTFGK**K**KGPNANS 59

EQB77739.1 GRAKRRMQYNRRFVNVVPTFGK**K**KGPNANS 133

*:***************************


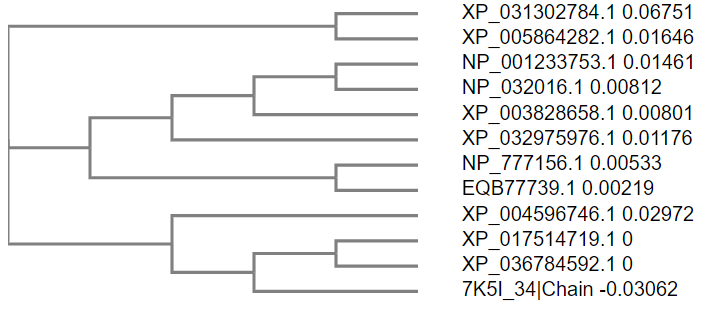


**Ribosomal s3 alignment**

>7K5I_4|Chain D|40S ribosomal protein S3|Homo sapiens (9606)

MAVQISKKRKFVADGIFKAELNEFLTRELAEDGYSGVEVRVTPTRTEIIILATRTQNVLGEKGRRIRELTAVVQKRFGFPEGSVELYAEKVATRGLCAIAQAESLRYKLLGGLAVRRACYGVLRFIMESGAKGCEVVVSGKLRGQRAKSMKFVDGLMIHSGDPVNYYVDTAVRHVLLRQGVLGIKVKIMLPWDPTGKIGPKKPLPDHVSIVEPKDEILPTTPISEQKGGKPEPPAMPQPVPTA

>XP_036882172.1 40S ribosomal protein S3 isoform X2 [Manis javanica]

MESGAKGCEVVVSGKLRGQRAKSMKFVDGLMIHSGDPVNYYVDTAVRHVLLRQGVLGIKVKIMLPWDPSG

KIGPKKPLPDHVSIVEPKDEILPTTPISEQKGGKPEPPAMPQPVPTA

>XP_017497881.1 40S ribosomal protein S3 isoform X1 [Manis javanica]

MAVQISKKRKFVADGIFKAELNEFLTRELAEDGYSGVEVRVTPTRTEIIILATRTQNVLGEKGRRIRELT

AVVQKRFGFPEGSVELYAEKVATRGLCAIAQAESLRYKLLGGLAVRRACYGVLRFIMESGAKGCEVVVSG

KLRGQRAKSMKFVDGLMIHSGDPVNYYVDTAVRHVLLRQGVLGIKVKIMLPWDPSGKIGPKKPLPDHVSI

VEPKDEILPTTPISEQKGGKPEPPAMPQPVPTA

>XP_036785703.1 40S ribosomal protein S3 isoform X1 [Manis pentadactyla]

MAVQISKKRKFVADGIFKAELNEFLTRELAEDGYSGVEVRVTPTRTEIIILATRTQNVLGEKGRRIRELT

AVVQKRFGFPEGSVELYAEKVATRGLCAIAQAESLRYKLLGGLAVRRACYGVLRFIMESGAKGCEVVVSG

KLRGQRAKSMKFVDGLMIHSGDPVNYYVDTAVRHVLLRQGVLGIKVKIMLPWDPSGKIGPKKPLPDHVSI

VEPKDEILPTTPISEQKGGKPEPPAMPQPVPTA

>XP_036785704.1 40S ribosomal protein S3 isoform X2 [Manis pentadactyla]

MAVQISKKRKLYAEKVATRGLCAIAQAESLRYKLLGGLAVRRACYGVLRFIMESGAKGCEVVVSGKLRGQ

RAKSMKFVDGLMIHSGDPVNYYVDTAVRHVLLRQGVLGIKVKIMLPWDPSGKIGPKKPLPDHVSIVEPKD

EILPTTPISEQKGGKPEPPAMPQPVPTA

>XP_036785705.1 40S ribosomal protein S3 isoform X3 [Manis pentadactyla]

MESGAKGCEVVVSGKLRGQRAKSMKFVDGLMIHSGDPVNYYVDTAVRHVLLRQGVLGIKVKIMLPWDPSG

KIGPKKPLPDHVSIVEPKDEILPTTPISEQKGGKPEPPAMPQPVPTA

>XP_004589944.1 40S ribosomal protein S3 [Ochotona princeps]

MAVQISKKRKFVADGIFKAELNEFLTRELAEDGYSGVEVRVTPTRTEIIILATRTQNVLGEKGRRIRELT

AVVQKRFGFPEGSVELYAEKVATRGLCAIAQAESLRYKLLGGLAVRRACYGVLRFIMESGAKGCEVVVSG

KLRGQRAKSMKFVDGLMIHSGDPVNYYVDTAVRHVLLRQGVLGIKVKIMLPWDPSGKIGPKKPLPDHVSI

VEPKDEILPTTPISEQKGGKPEPPAMPQPVPTA

>sp|Q3T169.1|RS3_BOVIN RecName: Full=40S ribosomal protein S3

MAVQISKKRKFVADGIFKAELNEFLTRELAEDGYSGVEVRVTPTRTEIIILATRTQNVLGEKGRRIRELT

AVVQKRFGFPEGSVELYAEKVATRGLCAIAQAESLRYKLLGGLAVRRACYGVLRFIMESGAKGCEVVVSG

KLRGQRAKSMKFVDGLMIHSGDPVNYYVDTAVRHVLLRQGVLGIKVKIMLPWDPTGKIGPKKPLPDHVSI

VEPKDEILPTTPISEQKGGKPEPPAMPQPVPTA

>XP_027813847.1 40S ribosomal protein S3 [Ovis aries]

MAVQISKKRKFVADGIFKAELNEFLTRELAEDGYSGVEVRVTPTRTEIIILATRTQNVLGEKGRRIRELT

AVVQKRFGFPEGSVELYAEKVATRGLCAIAQAESLRYKLLGGLAVRRACYGVLRFIMESGAKGCEVVVSG

KLRGQRAKSMKFVDGLMIHSGDPVNYYVDTAVRHVLLRQGVLGIKVKIMLPWDPTGKIGPKKPLPDHVSI

VEPKDEILPTTPISEQKGGKPEPPAMPQPVPTA

>XP_018891660.1 40S ribosomal protein S3 [Gorilla gorilla gorilla]

MAVQISKKRKFVADGIFKAELNEFLTRELAEDGYSGVEVRVTPTRTEIIILATRTQNVLGEKGRRIRELT

AVVQKRFGFPEGSVELYAEKVATRGLCAIAQAESLRYKLLGGLAVRRACYGVLRFIMESGAKGCEVVVSG

KLRGQRAKSMKFVDGLMIHSGDPVNYYVDTAVRHVLLRQGVLGIKVKIMLPWDPTGKIGPKKPLPDHVSI

VEPKDEILPTTPISEQKGGKPEPPAMPQPVPTA

>XP_003923526.1 40S ribosomal protein S3 [Saimiri boliviensis boliviensis]

MAVQISKKRKFVADGIFKAELNEFLTRELAEDGYSGVEVRVTPTRTEIIILATRTQNVLGEKGRRIRELT

AVVQKRFGFPEGSVELYAEKVATRGLCAIAQAESLRYKLLGGLAVRRACYGVLRFIMESGAKGCEVVVSG

KLRGQRAKSMKFVDGLMIHSGDPVNYYVDTAVRHVLLRQGVLGIKVKIMLPWDPTGKIGPKKPLPDHVSI

VEPKDEILPTTPISEQKGGKPEPPAMPQPVPTA

>NP_001238928.1 40S ribosomal protein S3 [Pan troglodytes]

MAVQISKKRKFVADGIFKAELNEFLTRELAEDGYSGVEVRVTPTRTEIIILATRTQNVLGEKGRRIRELT

AVVQKRFGFPEGSVELYAEKVATRGLCAIAQAESLRYKLLGGLAVRRACYGVLRFIMESGAKGCEVVVSG

KLRGQRAKSMKFVDGLMIHSGDPVNYYVDTAVRHVLLRQGVLGIKVKIMLPWDPTGKIGPKKPLPDHVSI

VEPKDEILPTTPISEQKGGKPEPPAMPQPVPTA

>NP_036182.1 40S ribosomal protein S3 [Mus musculus]

MAVQISKKRKFVADGIFKAELNEFLTRELAEDGYSGVEVRVTPTRTEIIILATRTQNVLGEKGRRIRELT

AVVQKRFGFPEGSVELYAEKVATRGLCAIAQAESLRYKLLGGLAVRRACYGVLRFIMESGAKGCEVVVSG

KLRGQRAKSMKFVDGLMIHSGDPVNYYVDTAVRHVLLRQGVLGIKVKIMLPWDPSGKIGPKKPLPDHVSI

VEPKDEILPTTPISEQKGGKPEPPAMPQPVPTA

>XP_032976824.1 40S ribosomal protein S3 [Rhinolophus ferrumequinum]

MAVQISKKRKFVADGIFKAELNEFLTRELAEDGYSGVEVRVTPTRTEIIILATRTQNVLGEKGRRIRELT

AVVQKRFGFPEGSVELYAEKVATRGLCAIAQAESLRYKLLGGLAVRRACYGVLRFIMESGAKGCEVVVSG

KLRGQRAKSMKFVDGLMIHSGDPVNYYVDTAVRHVLLRQGVLGIKVKIMLPWDPSGKIGPKKPLPDHVSI

VEPKDEILPTTPISEQKGGKPEPPAMPQPVPTA

>EPQ08311.1 40S ribosomal protein S3 [Myotis brandtii]

MADGVDHIDIYADVGEEFNQEAEYGGHDQIDLYDDVISPSANNGDAPEDRDYMDTLPPTVGDDVGKGAAP

NVVYTYTGKRIALYIGNLTWFVADGIFKAELNEFLTRELAEDGYSGVEVRVTPNRTEIIILATRTQNVLG

EKGRRIRELTAVVQKRFGFPEGSVELYAEKVATRGLCAIAQAESLRYKLLGGLAVRRACYGVLRFIMESG

AKGCEVVVSGKLRGQRAKSMKFVDGLMIHSGDPVNYYVDTAVRHVLLRQGVLGIKVKIMLPWDPSGKIGP

KKPLPDHVSIVEPKDEILPTTPISEQKGGKPEPPAMPQPVPTA

>KAB1272405.1 40S ribosomal protein S3 [Camelus dromedarius]

MAVQISKKRKFVADGIFKAELNEFLTRELAEDGYSGVEKRFGFPEGSVELYAEKVATRGLCAIAQAESLR

YKLLGGLAVRRACYGVLRFIMESGAKGCEVVVSGKLRGQRAKSMKFVDGLMIHSGDPVNYYVDTAVRHVL

LRQGAFVPFSDDMMTSQKGHILAFGPCVLGIKVKIMLPWDPTGKIGPKKPLPDHVSIVEPKDEILPTTPI

SEQKGGKPEPPAMPQPVPTA

KAB1272405.1 ------------------------------------------------------------ 0

7K5I_4|Chain ------------------------------------------------------------ 0

sp|Q3T169.1|RS3_BOVIN ------------------------------------------------------------ 0

XP_027813847.1 ------------------------------------------------------------ 0

XP_018891660.1 ------------------------------------------------------------ 0

XP_003923526.1 ------------------------------------------------------------ 0

NP_001238928.1 ------------------------------------------------------------ 0

EPQ08311.1 MADGVDHIDIYADVGEEFNQEAEYGGHDQIDLYDDVISPSANNGDAPEDRDYMDTLPPTV 60

XP_036785704.1 ------------------------------------------------------------ 0

XP_036882172.1 ------------------------------------------------------------ 0

XP_017497881.1 ------------------------------------------------------------ 0

XP_036785703.1 ------------------------------------------------------------ 0

XP_036785705.1 ------------------------------------------------------------ 0

XP_004589944.1 ------------------------------------------------------------ 0

NP_036182.1 ------------------------------------------------------------ 0

XP_032976824.1 ------------------------------------------------------------ 0

KAB1272405.1 --------------------MAVQISKKRKFVADGIFKAELNEFLTRELAEDGYSGVE-- 38

7K5I_4|Chain --------------------MAVQISKKRKFVADGIFKAELNEFLTRELAEDGYSGVEVR 40

sp|Q3T169.1|RS3_BOVIN --------------------MAVQISKKRKFVADGIFKAELNEFLTRELAEDGYSGVEVR 40

XP_027813847.1 --------------------MAVQISKKRKFVADGIFKAELNEFLTRELAEDGYSGVEVR 40

XP_018891660.1 --------------------MAVQISKKRKFVADGIFKAELNEFLTRELAEDGYSGVEVR 40

XP_003923526.1 --------------------MAVQISKKRKFVADGIFKAELNEFLTRELAEDGYSGVEVR 40

NP_001238928.1 --------------------MAVQISKKRKFVADGIFKAELNEFLTRELAEDGYSGVEVR 40

EPQ08311.1 GDDVGKGAAPNVVYTYTGKRIALYIGNLTWFVADGIFKAELNEFLTRELAEDGYSGVEVR 120

XP_036785704.1 ------------------------------------------------------------ 0

XP_036882172.1 ------------------------------------------------------------ 0

XP_017497881.1 --------------------MAVQISKKRKFVADGIFKAELNEFLTRELAEDGYSGVEVR 40

XP_036785703.1 --------------------MAVQISKKRKFVADGIFKAELNEFLTRELAEDGYSGVEVR 40

XP_036785705.1 ------------------------------------------------------------ 0

XP_004589944.1 --------------------MAVQISKKRKFVADGIFKAELNEFLTRELAEDGYSGVEVR 40

NP_036182.1 --------------------MAVQISKKRKFVADGIFKAELNEFLTRELAEDGYSGVEVR 40

XP_032976824.1 --------------------MAVQISKKRKFVADGIFKAELNEFLTRELAEDGYSGVEVR 40

KAB1272405.1 ----------------------------------KRFGFPEGSVELYAEKVATRGLCAIA 64

7K5I_4|Chain VTPTRTEIIILATRTQNVLGEKGRRIRELTAVVQKRFGFPEGSVELYAEKVATRGLCAIA 100

sp|Q3T169.1|RS3_BOVIN VTPTRTEIIILATRTQNVLGEKGRRIRELTAVVQKRFGFPEGSVELYAEKVATRGLCAIA 100

XP_027813847.1 VTPTRTEIIILATRTQNVLGEKGRRIRELTAVVQKRFGFPEGSVELYAEKVATRGLCAIA 100

XP_018891660.1 VTPTRTEIIILATRTQNVLGEKGRRIRELTAVVQKRFGFPEGSVELYAEKVATRGLCAIA 100

XP_003923526.1 VTPTRTEIIILATRTQNVLGEKGRRIRELTAVVQKRFGFPEGSVELYAEKVATRGLCAIA 100

NP_001238928.1 VTPTRTEIIILATRTQNVLGEKGRRIRELTAVVQKRFGFPEGSVELYAEKVATRGLCAIA 100

EPQ08311.1 VTPNRTEIIILATRTQNVLGEKGRRIRELTAVVQKRFGFPEGSVELYAEKVATRGLCAIA 180

XP_036785704.1 -----------------------------------MAVQISKKRKLYAEKVATRGLCAIA 25

XP_036882172.1 ------------------------------------------------------------ 0

XP_017497881.1 VTPTRTEIIILATRTQNVLGEKGRRIRELTAVVQKRFGFPEGSVELYAEKVATRGLCAIA 100

XP_036785703.1 VTPTRTEIIILATRTQNVLGEKGRRIRELTAVVQKRFGFPEGSVELYAEKVATRGLCAIA 100

XP_036785705.1 ------------------------------------------------------------ 0

XP_004589944.1 VTPTRTEIIILATRTQNVLGEKGRRIRELTAVVQKRFGFPEGSVELYAEKVATRGLCAIA 100

NP_036182.1 VTPTRTEIIILATRTQNVLGEKGRRIRELTAVVQKRFGFPEGSVELYAEKVATRGLCAIA 100

XP_032976824.1 VTPTRTEIIILATRTQNVLGEKGRRIRELTAVVQKRFGFPEGSVELYAEKVATRGLCAIA 100

KAB1272405.1 QAESLRYKLLGG**LA**V**RR**ACYGVLRFIMESGAKGCEVVVSGKL**R**GQRAKSMKFVDGLMIHS 124

7K5I_4|Chain QAESLRYKLLGG**LAVRR**ACYGVLRFIMESGAKGCEVVVSGKL**R**GQRAKSMKFVDGLMIHS 160

sp|Q3T169.1|RS3_BOVIN QAESLRYKLLGG**LAVRR**ACYGVLRFIMESGAKGCEVVVSGKL**R**GQRAKSMKFVDGLMIHS 160

XP_027813847.1 QAESLRYKLLGG**LAVRR**ACYGVLRFIMESGAKGCEVVVSGKL**R**GQRAKSMKFVDGLMIHS 160

XP_018891660.1 QAESLRYKLLGG**LAVRR**ACYGVLRFIMESGAKGCEVVVSGKL**R**GQRAKSMKFVDGLMIHS 160

XP_003923526.1 QAESLRYKLLGG**LAVRR**ACYGVLRFIMESGAKGCEVVVSGKL**R**GQRAKSMKFVDGLMIHS 160

NP_001238928.1 QAESLRYKLLGG**LAVRR**ACYGVLRFIMESGAKGCEVVVSGKL**R**GQRAKSMKFVDGLMIHS 160

EPQ08311.1 QAESLRYKLLGG**LAVRR**ACYGVLRFIMESGAKGCEVVVSGKL**R**GQRAKSMKFVDGLMIHS 240

XP_036785704.1 QAESLRYKLLGG**LAVRR**ACYGVLRFIMESGAKGCEVVVSGKL**R**GQRAKSMKFVDGLMIHS 85

XP_036882172.1 --------------------------MESGAKGCEVVVSGKL**R**GQRAKSMKFVDGLMIHS 34

XP_017497881.1 QAESLRYKLLGG**LAVRR**ACYGVLRFIMESGAKGCEVVVSGKL**R**GQRAKSMKFVDGLMIHS 160

XP_036785703.1 QAESLRYKLLGG**LAVRR**ACYGVLRFIMESGAKGCEVVVSGKL**R**GQRAKSMKFVDGLMIHS 160

XP_036785705.1 ------------**-----**---------MESGAKGCEVVVSGKL**R**GQRAKSMKFVDGLMIHS 34

XP_004589944.1 QAESLRYKLLGG**LAVRR**ACYGVLRFIMESGAKGCEVVVSGKL**R**GQRAKSMKFVDGLMIHS 160

NP_036182.1 QAESLRYKLLGG**LAVRR**ACYGVLRFIMESGAKGCEVVVSGKL**R**GQRAKSMKFVDGLMIHS 160

XP_032976824.1 QAESLRYKLLGG**LAVRR**ACYGVLRFIMESGAKGCEVVVSGKL**R**GQRAKSMKFVDGLMIHS 160

**********************************

KAB1272405.1 GDPVNYYVDTAVRHVLLRQGAFVPFSDDMMTSQKGHILAFGPCVLGIKVKIMLPWDPTGK 184

7K5I_4|Chain GDPVNYYVDTAVRHVLLRQG-----------------------VLGIKVKIMLPWDPTGK 197

sp|Q3T169.1|RS3_BOVIN GDPVNYYVDTAVRHVLLRQG-----------------------VLGIKVKIMLPWDPTGK 197

XP_027813847.1 GDPVNYYVDTAVRHVLLRQG-----------------------VLGIKVKIMLPWDPTGK 197

XP_018891660.1 GDPVNYYVDTAVRHVLLRQG-----------------------VLGIKVKIMLPWDPTGK 197

XP_003923526.1 GDPVNYYVDTAVRHVLLRQG-----------------------VLGIKVKIMLPWDPTGK 197

NP_001238928.1 GDPVNYYVDTAVRHVLLRQG-----------------------VLGIKVKIMLPWDPTGK 197

EPQ08311.1 GDPVNYYVDTAVRHVLLRQG-----------------------VLGIKVKIMLPWDPSGK 277

XP_036785704.1 GDPVNYYVDTAVRHVLLRQG-----------------------VLGIKVKIMLPWDPSGK 122

XP_036882172.1 GDPVNYYVDTAVRHVLLRQG-----------------------VLGIKVKIMLPWDPSGK 71

XP_017497881.1 GDPVNYYVDTAVRHVLLRQG-----------------------VLGIKVKIMLPWDPSGK 197

XP_036785703.1 GDPVNYYVDTAVRHVLLRQG-----------------------VLGIKVKIMLPWDPSGK 197

XP_036785705.1 GDPVNYYVDTAVRHVLLRQG-----------------------VLGIKVKIMLPWDPSGK 71

XP_004589944.1 GDPVNYYVDTAVRHVLLRQG-----------------------VLGIKVKIMLPWDPSGK 197

NP_036182.1 GDPVNYYVDTAVRHVLLRQG-----------------------VLGIKVKIMLPWDPSGK 197

XP_032976824.1 GDPVNYYVDTAVRHVLLRQG-----------------------VLGIKVKIMLPWDPSGK 197

******************** **************:**

KAB1272405.1 IGPKKPLPDHVSIVEPKDEILPTTPISEQKGGKPEPPAMPQPVPTA 230

7K5I_4|Chain IGPKKPLPDHVSIVEPKDEILPTTPISEQKGGKPEPPAMPQPVPTA 243

sp|Q3T169.1|RS3_BOVIN IGPKKPLPDHVSIVEPKDEILPTTPISEQKGGKPEPPAMPQPVPTA 243

XP_027813847.1 IGPKKPLPDHVSIVEPKDEILPTTPISEQKGGKPEPPAMPQPVPTA 243

XP_018891660.1 IGPKKPLPDHVSIVEPKDEILPTTPISEQKGGKPEPPAMPQPVPTA 243

XP_003923526.1 IGPKKPLPDHVSIVEPKDEILPTTPISEQKGGKPEPPAMPQPVPTA 243

NP_001238928.1 IGPKKPLPDHVSIVEPKDEILPTTPISEQKGGKPEPPAMPQPVPTA 243

EPQ08311.1 IGPKKPLPDHVSIVEPKDEILPTTPISEQKGGKPEPPAMPQPVPTA 323

XP_036785704.1 IGPKKPLPDHVSIVEPKDEILPTTPISEQKGGKPEPPAMPQPVPTA 168

XP_036882172.1 IGPKKPLPDHVSIVEPKDEILPTTPISEQKGGKPEPPAMPQPVPTA 117

XP_017497881.1 IGPKKPLPDHVSIVEPKDEILPTTPISEQKGGKPEPPAMPQPVPTA 243

XP_036785703.1 IGPKKPLPDHVSIVEPKDEILPTTPISEQKGGKPEPPAMPQPVPTA 243

XP_036785705.1 IGPKKPLPDHVSIVEPKDEILPTTPISEQKGGKPEPPAMPQPVPTA 117

XP_004589944.1 IGPKKPLPDHVSIVEPKDEILPTTPISEQKGGKPEPPAMPQPVPTA 243

NP_036182.1 IGPKKPLPDHVSIVEPKDEILPTTPISEQKGGKPEPPAMPQPVPTA 243

XP_032976824.1 IGPKKPLPDHVSIVEPKDEILPTTPISEQKGGKPEPPAMPQPVPTA 243

**********************************************


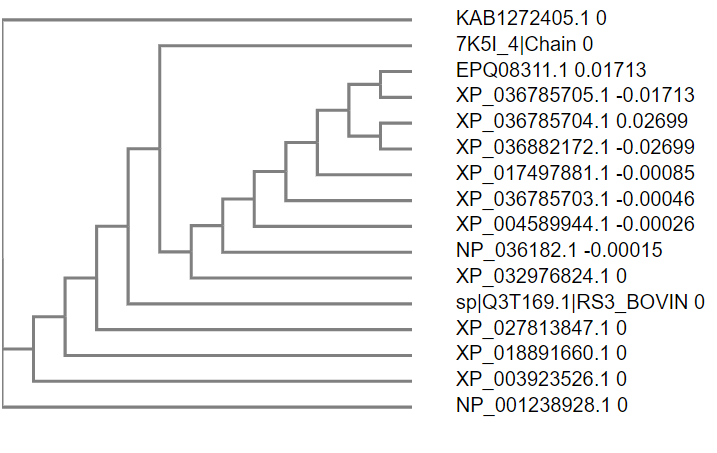


**Ribosomal s2 alignment**

>7K5I_19|Chain C|40S ribosomal protein S2|Homo sapiens (9606)

MADDAGAAGGPGGPGGPGMGNRGGFRGGFGSGIRGRGRGRGRGRGRGRGARGGKAEDKEWMPVTKLGRLVKDMKIKSLEEIYLFSLPIKESEIIDFFLGASLKDEVLKIMPVQKQTRAGQRTRFKAFVAIGDYNGHVGLGVKCSKEVATAIRGAIILAKLSIVPVRRGYWGNKIGKPHTVPCKVTGRCGSVLVRLIPAPRGTGIVSAPVPKKLLMMAGIDDCYTSARGCTATLGNFAKATFDAISKTYSYLTPDLWKETVFTKSPYQEFTDHLVKTHTRVSVQRTQAPAVATT

>NP_001028785.1 40S ribosomal protein S2 [Bos taurus]

MADDAGAAGGPGGPGGPGMGGRGGFRGGFGSGVRGRGRGRGRGRGRGRGARGGKAEDKEWLPVTKLGRLV

KDMKIKSLEEIYLFSLPIKESEIIDFFLGASLKDEVLKIMPVQKQTRAGQRTRFKAFVAIGDYNGHVGLG

VKCSKEVATAIRGAIILAKLSIVPVRRGYWGNKIGKPHTVPCKVTGRCGSVLVRLIPAPRGTGIVSAPVP

KKLLMMAGIDDCYTSARGCTATLGNFAKATFDAISKTYSYLTPDLWKETVFTKSPYQEFTDHLVKTHTRV

SVQRTQAPAVATT

>XP_005866630.1 PREDICTED: 40S ribosomal protein S2 [Myotis brandtii]

MADDAGAAGGPGGPGGPGLGGRGGFRGGFGSGIRGRGRGRGRGRGRGRGARGGKAEDKEWIPVTKLGRLV

KDMKIKSLEEIYLFSLPIKESEIIDFFLGASLKDEVLKIMPVQKQTRAGQRTRFKAFVAIGDYNGHVGLG

VKCSKEVATAIRGAIILAKLSIVPVRRGYWGNKIGKPHTVPCKVTGRCGSVLVRLIPAPRGTGIVSAPVP

KKLLMMAGIDDCYTSARGCTATLGNFAKATFDAISKTYSYLTPDLWKETVFTKSPYQEFTDHLVKTHTRV

SVQRTQAPAVATT

>BAE38973.1 unnamed protein product [Mus musculus]

MADDAGAAGGPGGPGGPGLGGRGGFRGGFGSGLRGRGRGRGRGRGRGRGARGGKAEDKEWIPVTKLGRLV

KDMKIKSLEEIYLFSLPIKESEIIDFFLGASLKDEVLKIMPVQKQTRAGQRTRFKAFVAIGDYNGHVGLG

VKCSKEVATAIRGAIILAKLSIVPVRRGYWGNKIGKPHTVPCKVTGRCGSVLVRLIPAPRGTGIVSAPVP

KKLLMMAGIDNCYTSARGCTATLGNFAKATFDAISKTYSYLTPDLWKETVFTKSPYQEFTDHLVKTHTRV

SVQRTQAPAVATT

>XP_010948201.1 PREDICTED: 40S ribosomal protein S2 [Camelus bactrianus]

MADDAGAAGGPGGPGGPGAPGMGGRGGFRGGFGSGVRGRGRGRGRGRGRGRGARGGKAEDKEWLPVTKLG

RLVKDMKIKSLEEIYLFSLPIKESEIIDFFLGASLKDEVLKIMPVQKQTRAGQRTRFKAFVAIGDYNGHV

GLGVKCSKEVATAIRGAIILAKLSIVPVRRGYWGNKIGKPHTVPCKVTGRCGSVLVRLIPAPRGTGIVSA

PVPKKLLMMAGIDDCYTSARGCTATLGNFAKATFDAISKTYSYLTPDLWKETVFTKSPYQEFTDHLVKTH

TRVSVQRTQAPAVATT

>XP_032957782.1 40S ribosomal protein S2 [Rhinolophus ferrumequinum]

MADDAGAAGGAGAPGGPGLGGRGGFRGGFGSGVRGRGRGRGRGRGRGRGARGGKAEDKEWIPVTKLGRLV

KDMKIKSLEEIYLFSLPIKESEIIDFFLGASLKDEVLKIMPVQKQTRAGQRTRFKAFVAIGDYNGHVGLG

VKCSKEVATAIRGAIILAKLSIVPVRRGYWGNKIGKPHTVPCKVTGRCGSVLVRLIPAPRGTGIVSAPVP

KKLLMMAGIDDCYTSARGCTATLGNFAKATFDAISKTYSYLTPDLWKETVFTKSPYQEFTDHLVKTHTRV

SVQRTQAPAVATT

>XP_034790512.1 40S ribosomal protein S2-like [Pan paniscus]

MADDAGAAGGHGGPGGPGMGNRGGFRGGFGSGIRGRGCGRGRGRGRGRGARGGKAEDKEWMPVTKLGRLV

KDMKIKSLEEIYLFSLPIKESESIDFFLGASLKDEVLKIMPVQKQTRAGQRTRFKAFVAIGDYNGHVGLG

VKCSKEVATAIRGAIILAKLSIVPVHRGYWGNKIGKPHTVPCKVTGRCGSVLVHLIPAPRGTGIVSAPVP

KKLLMMAGIDDCYTSARGCTATLGNFAKATFDAISKTYSYLTPDLWKETVFTKSPYQEFTDHLVKTHTRV

SVQRTQAPAVATT

>XP_011950722.3 LOW QUALITY PROTEIN: 40S ribosomal protein S2 [Ovis aries]

MADDAGAAAGPGGPGGPGMGDRGGFRGGFGSGVRGRGRGRGRGRGRGRGACGGKAEDKEWLPVTKLGRLV

KDMKIKPLEEIYLFSLPIKESEIIDFFLGASLKDEVLKIMPVQKQTRAGQRTRFKAFVAIADYNGHVGLG

VKCSKEVATAIRGAIILAKLSIVPVRRGYWGNKIGKPHTVPCKVTGRCGSVLVRLIPAPRGTGIVSAPVP

KKLLLMAGIDDCYTSARGCTATLGNFAKATFDAISKTYSYLTPDLWKETVFTKSPYQEFTDHLVKTHTRV

SVQRTQAPAVATT

>XP_010331860.1 40S ribosomal protein S2 [Saimiri boliviensis boliviensis]

MADDAGAAGGPGGPGGPGMGNRGGFRGGFGSGIRGRGRGRGARGGKAEDKEWMPVTKLGRLVKDMKIKSL

EEIYLFSLPIKESEIIDFFLGASLKDEVLKIMPVQKQTRAGQRTRFKEFVAIGDYNGHVGLGVKCSKEVA

TAIRGAIILAKLSIVPVRRGYWGNKIGKPHTVPCKVTGRCGSVLVRLIPTPRGTGIVSAPVPKKLLMMAG

IDDCYTSARGCTATLGNFAKATFDAISKTYSYLTPDLWKETVFTKSPYQEFTDHLVKTHTRVSVQRTQAP

AVATT

>XP_036771849.1 40S ribosomal protein S2 [Manis pentadactyla]

MADDAGAAGGPGGPGAPVIGGRGNFRGGFGSGGRGRGRGRGRGRGRGRGARGGKAEDKEWIPVTKLGRLV

KDMKIKSLEEIYLFSLPIKESEIIDFFLGASLKDEVLKIMPVQKQTRAGQRTRFKAFVAIGDYNGHVGLG

VKCSKEVATAIRGAIILAKLSIVPVRRGYWGNKIGKPHTVPCKVTGRCGSVLVRLIPAPRGTGIVSAPVP

KKLLMMAGIDDCYTSARGCTATLGNFAKATFDAISKTYSYLTPDLWKETVFTKSPYQEFTDHLVKTHTRV

SVQRTQAPAVATT

>XP_036859875.1 LOW QUALITY PROTEIN: 40S ribosomal protein S2 [Manis javanica]

MGGFLSRVVGVLLTELVGLLIKLVGVLLTKLVGLLIKLVGVLLTKLVGLLIKLLGFLLTELVGSLLPNLR

PPARPALLSSSARPLPPRPAGIPFTPRSAEDKEWIPVTKLGRLVKDMKIKSLEEIYLFSLPIKESEIIDF

FLGASLKDDVLKIMPVQKQTRAGQRTRFKAFVAIGHYNGHVGLGXSKEVATAIRGAIILAKLSIVPVRQG

YWGNKIGKPHTVPCKVTGRCGSVPVRLIPAPRGTGIVSAPVPKKLLLMAGIDDCYTSARGCTATLGNFAK

ATFDAISKTYSYLTPDLWKETVFTKSPYQEFTDHLVKTHTRVSVQRTQAPAVATT

>XP_004057030.1 40S ribosomal protein S2 [Gorilla gorilla gorilla]

MADDAGAAGGPGGPGGPGMGNRGGFRGGFGSGIRGRGRGRGRGRGRGRGARGGKAEDKEWMPVTKLGRLV

KDMKIKSLEEIYLFSLPIKESEIIDFFLGASLKDEVLKIMPVQKQTRAGQRTRFKAFVAIGDYNGHVGLG

VKCSKEVATAIRGAIILAKLSIVPVRRGYWGNKIGKPHTVPCKVTGRCGSVLVRLIPAPRGTGIVSAPVP

KKLLMMAGIDDCYTSARGCTATLGNFAKATFDAISKTYSYLTPDLWKETVFTKSPYQEFTDHLVKTHTRV

SVQRTQAPAVATT

>XP_012785678.1 40S ribosomal protein S2 [Ochotona princeps]

MKIKSLEEIYLFSLPIKESEIIDFFLGASLKDEVLKIMPVQKQTRAGQRTRFKAFVAIGDYNGHVGLGVK

CSKEVATAIRGAIILAKLSIVPVRRGYWGNKIGKPHTVPCKVTGRCGSVLVRLIPAPRGTGIVSAPVPKK

LLMMAGIDDCYTSARGCTATLGNFAKATFDAISKTYSYLTPDLWKETVFTKSPYQEFTDHLVKTHTRVSV

QRTQAPAVATT

>XP_011822347.1 PREDICTED: 40S ribosomal protein S2 [Mandrillus leucophaeus]

MVLSFSLMHSPQLSCLLQESEIIDFFLGASLKDEVLKIMPVQKQTRAGQRTRFKAFVAIGDYNGHVGLGV

KCSKEVATAIRGAIILAKLSIVPVRRGYWGNKIGKPHTVPCKVTGRCGSVLVRLIPAPRGTGIVSAPVPK

KLLMMAGIDDCYTSARGCTATLGNFAKATFDAISKTYSYLTPDLWKETVFTKSPYQEFTDHLVKTHTRVS

VQRTQAPAVATT

>XP_011851569.1 PREDICTED: 40S ribosomal protein S2 isoform X1 [Mandrillus leucophaeus]

MADDAGAAGGPGGPGGPGLVNRGGFCGGFGSGIRGRGRGCGRGRGRGRGARRGKAEDKEWMPVTKLGRLV

KDMKIKSLEEIYLFSLPIKESEIIDFFLGASLKDEVLKIMTVQKQTRAGQRTRFKAFVAIGDYNGHVGLG

VKCSKEVATAIRGAIILAKLSIVPVRRGYWGNKIGKPHTVPCKVTGRCGSVLVRLIPAPRGTGIVSAPVP

KKLLMMAGIDDCYTSARGCTATLGNFAKATFDAISETYSYLIPDLWKETVFTRSPYQEFTDHLVKTHTGV

SVQRTQAPAVATT

>KAB1275889.1 40S ribosomal protein S2 [Camelus dromedarius]

MSEVVVEPGVGVNPKPVHLHLPGEAPGVCTCWVGWPVPAAGMIAYCVGGYSGEPRATSEIRTAPDREADV

SNVFKEDTFTNWGQLFHAHCGCSVPNVSCLLPAGFSWGSCTQFSLVEAVAAQPASQSSRKQGPAGPPGQD

LLAIWDCNSQAGLSGKCSEEVVMVILGAIILVKLSIVPVWQCYWGNNTGKSNTVPASASCHPQRHWHHLG

LCAQERMTTTPQPGTVLPT

KAB1257857.1 ------------------------------------------------------------ 0

XP_011822347.1 ------------------------------------------------------------ 0

XP_036859875.1 MGGFLSRVVGVLLTELVGLLIKLVGVLLTKLVGLLIKLVGVLLTKLVGLLIKLLGFLLTE 60

XP_011851569.1 ---------------------------------------------------------MAD 3

XP_011950722.3 ---------------------------------------------------------MAD 3

XP_034790512.1 ---------------------------------------------------------MAD 3

XP_010331860.1 ---------------------------------------------------------MAD 3

BAE38973.1 ---------------------------------------------------------MAD 3

XP_036771849.1 ---------------------------------------------------------MAD 3

XP_032957782.1 ---------------------------------------------------------MAD 3

XP_010948201.1 ---------------------------------------------------------MAD 3

XP_005866630.1 ---------------------------------------------------------MAD 3

NP_001028785.1 ---------------------------------------------------------MAD 3

7K5I_19|Chain ---------------------------------------------------------MAD 3

XP_004057030.1 ---------------------------------------------------------MAD 3

XP_012785678.1 ------------------------------------------------------------ 0

KAB1257857.1 ------------------------------------------------------------ 0

XP_011822347.1 ------------------------------------------------------------ 0

XP_036859875.1 LVGSLLP--NLRPPARPALLSSS--------------ARPLPPRPAGIPFTPRSAEDKEW 104

XP_011851569.1 DAGAAGG---PGGPGGPGLVNRGGFCGGFGSGIRGRGRGCGRGRGRGRGARRGKAEDKEW 60

XP_011950722.3 DAGAAA---GPGGPGGPGMGDRGGFRGGFGSGVRGRGRGRGRGRGRGRGACGGKAEDKEW 60

XP_034790512.1 DAGAAGGH---GGPGGPGMGNRGGFRGGFGSGIRGRGCGRGRGRGRGRGARGGKAEDKEW 60

XP_010331860.1 DAGAAGGP---GGPGGPGMGNRGGFRGGFGSGIRGRG--------RGRGARGGKAEDKEW 52

BAE38973.1 DAGAAGGPGG---PGGPGLGGRGGFRGGFGSGLRGRGRGRGRGRGRGRGARGGKAEDKEW 60

XP_036771849.1 DAGAAG---GPGGPGAPVIGGRGNFRGGFGSGGRGRGRGRGRGRGRGRGARGGKAEDKEW 60

XP_032957782.1 DAGAAGGAG---APGGPGLGGRGGFRGGFGSGVRGRGRGRGRGRGRGRGARGGKAEDKEW 60

XP_010948201.1 DAGAAGGPGGPGGPGAPGMGGRGGFRGGFGSGVRGRGRGRGRGRGRGRGARGGKAEDKEW 63

XP_005866630.1 DAGAAGGPG---GPGGPGLGGRGGFRGGFGSGIRGRGRGRGRGRGRGRGARGGKAEDKEW 60

NP_001028785.1 DAGAAGGPG---GPGGPGMGGRGGFRGGFGSGVRGRGRGRGRGRGRGRGARGGKAEDKEW 60

7K5I_19|Chain DAGAAGGPG---GPGGPGMGNRGGFRGGFGSGIRGRGRGRGRGRGRGRGARGGKAEDKEW 60

XP_004057030.1 DAGAAGGPG---GPGGPGMGNRGGFRGGFGSGIRGRGRGRGRGRGRGRGARGGKAEDKEW 60

XP_012785678.1 ------------------------------------------------------------ 0

KAB1257857.1 ---------------------------MVESEIIDFFLGASLKDE**V**LK**I**M**P**V**Q**KQTRAGQ 33

XP_011822347.1 --------MVL---SFSLMHSPQLSCLLQESEIIDFFLGASLKDE**V**LK**I**M**P**V**Q**KQTRAGQ 49

XP_036859875.1 IPVTKLGRLVKDMKIKSLEEIYLFSLPIKESEIIDFFLGASLKDD**V**LK**I**M**P**V**Q**KQTRAGQ 164

XP_011851569.1 MPVTKLGRLVKDMKIKSLEEIYLFSLPIKESEIIDFFLGASLKDE**V**LK**I**M**T**V**Q**KQTRAGQ 120

XP_011950722.3 LPVTKLGRLVKDMKIKPLEEIYLFSLPIKESEIIDFFLGASLKDE**V**LK**I**M**P**V**Q**KQTRAGQ 120

XP_034790512.1 MPVTKLGRLVKDMKIKSLEEIYLFSLPIKESESIDFFLGASLKDE**V**LK**I**M**P**V**Q**KQTRAGQ 120

XP_010331860.1 MPVTKLGRLVKDMKIKSLEEIYLFSLPIKESEIIDFFLGASLKDE**V**LK**I**M**P**V**Q**KQTRAGQ 112

BAE38973.1 IPVTKLGRLVKDMKIKSLEEIYLFSLPIKESEIIDFFLGASLKDE**V**LK**I**M**P**V**Q**KQTRAGQ 120

XP_036771849.1 IPVTKLGRLVKDMKIKSLEEIYLFSLPIKESEIIDFFLGASLKDE**V**LK**I**M**P**V**Q**KQTRAGQ 120

XP_032957782.1 IPVTKLGRLVKDMKIKSLEEIYLFSLPIKESEIIDFFLGASLKDE**V**LK**I**M**P**V**Q**KQTRAGQ 120

XP_010948201.1 LPVTKLGRLVKDMKIKSLEEIYLFSLPIKESEIIDFFLGASLKDE**V**LK**I**M**P**V**Q**KQTRAGQ 123

XP_005866630.1 IPVTKLGRLVKDMKIKSLEEIYLFSLPIKESEIIDFFLGASLKDE**V**LK**I**M**P**V**Q**KQTRAGQ 120

NP_001028785.1 LPVTKLGRLVKDMKIKSLEEIYLFSLPIKESEIIDFFLGASLKDE**V**LK**I**M**P**V**Q**KQTRAGQ 120

7K5I_19|Chain MPVTKLGRLVKDMKIKSLEEIYLFSLPIKESEIIDFFLGASLKDE**V**LK**I**M**P**V**Q**KQTRAGQ 120

XP_004057030.1 MPVTKLGRLVKDMKIKSLEEIYLFSLPIKESEIIDFFLGASLKDE**V**LK**I**M**P**V**Q**KQTRAGQ 120

XP_012785678.1 ------------MKIKSLEEIYLFSLPIKESEIIDFFLGASLKDE**V**LK**I**M**P**V**Q**KQTRAGQ 48

: *** ***********:***** *********

KAB1257857.1 **QT**R**L**KAFVATGDDKG----------**--**--------------------RYKGNKIDKSHTI 61

XP_011822347.1 R**T**R**F**KAFVAIGDYNGHVGLGVKCSK**EV**ATAIRGAIILAKLSIVPVRRGYWGNKIGKPHTV 109

XP_036859875.1 R**T**R**F**KAFVAIGHYNGHVGLGX--SK**EV**ATAIRGAIILAKLSIVPVRQGYWGNKIGKPHTV 222

XP_011851569.1 R**T**R**F**KAFVAIGDYNGHVGLGVKCSK**EV**ATAIRGAIILAKLSIVPVRRGYWGNKIGKPHTV 180

XP_011950722.3 R**T**R**F**KAFVAIADYNGHVGLGVKCSK**EV**ATAIRGAIILAKLSIVPVRRGYWGNKIGKPHTV 180

XP_034790512.1 R**T**R**F**KAFVAIGDYNGHVGLGVKCSK**EV**ATAIRGAIILAKLSIVPVHRGYWGNKIGKPHTV 180

XP_010331860.1 R**T**R**F**KEFVAIGDYNGHVGLGVKCSK**EV**ATAIRGAIILAKLSIVPVRRGYWGNKIGKPHTV 172

BAE38973.1 R**T**R**F**KAFVAIGDYNGHVGLGVKCSK**EV**ATAIRGAIILAKLSIVPVRRGYWGNKIGKPHTV 180

XP_036771849.1 R**T**R**F**KAFVAIGDYNGHVGLGVKCSK**EV**ATAIRGAIILAKLSIVPVRRGYWGNKIGKPHTV 180

XP_032957782.1 R**T**R**F**KAFVAIGDYNGHVGLGVKCSK**EV**ATAIRGAIILAKLSIVPVRRGYWGNKIGKPHTV 180

XP_010948201.1 R**T**R**F**KAFVAIGDYNGHVGLGVKCSK**EV**ATAIRGAIILAKLSIVPVRRGYWGNKIGKPHTV 183

XP_005866630.1 R**T**R**F**KAFVAIGDYNGHVGLGVKCSK**EV**ATAIRGAIILAKLSIVPVRRGYWGNKIGKPHTV 180

NP_001028785.1 R**T**R**F**KAFVAIGDYNGHVGLGVKCSK**EV**ATAIRGAIILAKLSIVPVRRGYWGNKIGKPHTV 180

7K5I_19|Chain R**T**R**F**KAFVAIGDYNGHVGLGVKCSK**EV**ATAIRGAIILAKLSIVPVRRGYWGNKIGKPHTV 180

XP_004057030.1 R**T**R**F**KAFVAIGDYNGHVGLGVKCSK**EV**ATAIRGAIILAKLSIVPVRRGYWGNKIGKPHTV 180

XP_012785678.1 R**T**R**F**KAFVAIGDYNGHVGLGVKCSK**EV**ATAIRGAIILAKLSIVPVRRGYWGNKIGKPHTV 108

:**:* *** .. :* * ****.* **:

KAB1257857.1 PCKVTGCCSPMLVHLIPAPRGSGIISAPGLKKLLMMANTDDCNTSSGGCTVTLGNFTKAT 121

XP_011822347.1 PCKVTGRCGSVLVRLIPAPRGTGIVSAPVPKKLLMMAGIDDCYTSARGCTATLGNFAKAT 169

XP_036859875.1 PCKVTGRCGSVPVRLIPAPRGTGIVSAPVPKKLLLMAGIDDCYTSARGCTATLGNFAKAT 282

XP_011851569.1 PCKVTGRCGSVLVRLIPAPRGTGIVSAPVPKKLLMMAGIDDCYTSARGCTATLGNFAKAT 240

XP_011950722.3 PCKVTGRCGSVLVRLIPAPRGTGIVSAPVPKKLLLMAGIDDCYTSARGCTATLGNFAKAT 240

XP_034790512.1 PCKVTGRCGSVLVHLIPAPRGTGIVSAPVPKKLLMMAGIDDCYTSARGCTATLGNFAKAT 240

XP_010331860.1 PCKVTGRCGSVLVRLIPTPRGTGIVSAPVPKKLLMMAGIDDCYTSARGCTATLGNFAKAT 232

BAE38973.1 PCKVTGRCGSVLVRLIPAPRGTGIVSAPVPKKLLMMAGIDNCYTSARGCTATLGNFAKAT 240

XP_036771849.1 PCKVTGRCGSVLVRLIPAPRGTGIVSAPVPKKLLMMAGIDDCYTSARGCTATLGNFAKAT 240

XP_032957782.1 PCKVTGRCGSVLVRLIPAPRGTGIVSAPVPKKLLMMAGIDDCYTSARGCTATLGNFAKAT 240

XP_010948201.1 PCKVTGRCGSVLVRLIPAPRGTGIVSAPVPKKLLMMAGIDDCYTSARGCTATLGNFAKAT 243

XP_005866630.1 PCKVTGRCGSVLVRLIPAPRGTGIVSAPVPKKLLMMAGIDDCYTSARGCTATLGNFAKAT 240

NP_001028785.1 PCKVTGRCGSVLVRLIPAPRGTGIVSAPVPKKLLMMAGIDDCYTSARGCTATLGNFAKAT 240

7K5I_19|Chain PCKVTGRCGSVLVRLIPAPRGTGIVSAPVPKKLLMMAGIDDCYTSARGCTATLGNFAKAT 240

XP_004057030.1 PCKVTGRCGSVLVRLIPAPRGTGIVSAPVPKKLLMMAGIDDCYTSARGCTATLGNFAKAT 240

XP_012785678.1 PCKVTGRCGSVLVRLIPAPRGTGIVSAPVPKKLLMMAGIDDCYTSARGCTATLGNFAKAT 168

****** *. : *:***:***:**:*** ****:**. *:* **: ***.*****:***

KAB1257857.1 SDAVSKTYSHLTRDLRKGTAFTKSPALVTVKQ--------------------- 153

XP_011822347.1 FDAISKTYSYLTPDLWKETVFTKSPYQEFTDHLVKTHTRVSVQRTQAPAVATT 222

XP_036859875.1 FDAISKTYSYLTPDLWKETVFTKSPYQEFTDHLVKTHTRVSVQRTQAPAVATT 335

XP_011851569.1 FDAISETYSYLIPDLWKETVFTRSPYQEFTDHLVKTHTGVSVQRTQAPAVATT 293

XP_011950722.3 FDAISKTYSYLTPDLWKETVFTKSPYQEFTDHLVKTHTRVSVQRTQAPAVATT 293

XP_034790512.1 FDAISKTYSYLTPDLWKETVFTKSPYQEFTDHLVKTHTRVSVQRTQAPAVATT 293

XP_010331860.1 FDAISKTYSYLTPDLWKETVFTKSPYQEFTDHLVKTHTRVSVQRTQAPAVATT 285

BAE38973.1 FDAISKTYSYLTPDLWKETVFTKSPYQEFTDHLVKTHTRVSVQRTQAPAVATT 293

XP_036771849.1 FDAISKTYSYLTPDLWKETVFTKSPYQEFTDHLVKTHTRVSVQRTQAPAVATT 293

XP_032957782.1 FDAISKTYSYLTPDLWKETVFTKSPYQEFTDHLVKTHTRVSVQRTQAPAVATT 293

XP_010948201.1 FDAISKTYSYLTPDLWKETVFTKSPYQEFTDHLVKTHTRVSVQRTQAPAVATT 296

XP_005866630.1 FDAISKTYSYLTPDLWKETVFTKSPYQEFTDHLVKTHTRVSVQRTQAPAVATT 293

NP_001028785.1 FDAISKTYSYLTPDLWKETVFTKSPYQEFTDHLVKTHTRVSVQRTQAPAVATT 293

7K5I_19|Chain FDAISKTYSYLTPDLWKETVFTKSPYQEFTDHLVKTHTRVSVQRTQAPAVATT 293

XP_004057030.1 FDAISKTYSYLTPDLWKETVFTKSPYQEFTDHLVKTHTRVSVQRTQAPAVATT 293

XP_012785678.1 FDAISKTYSYLTPDLWKETVFTKSPYQEFTDHLVKTHTRVSVQRTQAPAVATT 221

**:*:***:* ** * *.**:** ..:


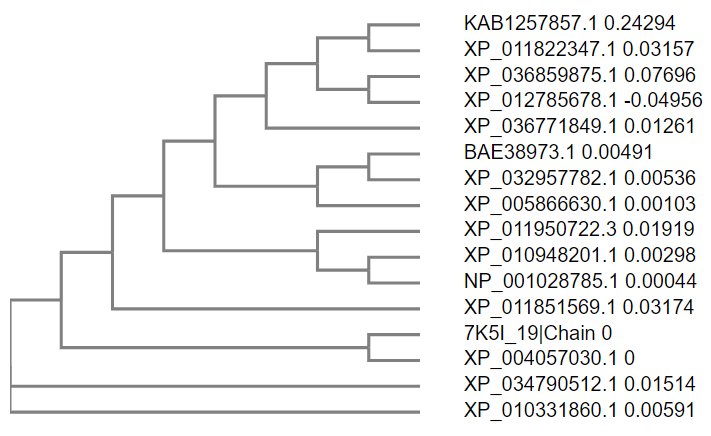

Supplement: Supplementary file 1 [file e566c3e746756981cf62d2b2.docx]
